# Supplementary material
Source: PubMed Central journal article supplement (PMC7653524)

**Supplementary Figure1. Other inhibitors cannot block HRG1-mediated phosphorylation of HER3 and AKT**

NCI-N87 and OE19 were first incubated with 1  $\mu\text{mol/L}$  lapatinib  $\pm$  1  $\mu\text{mol/L}$  erlotinib, 300 nmol/L crizotinib, 1  $\mu\text{mol/L}$  NVP-BGJ398, 300 nmol/L AZD0530 or 1  $\mu\text{mol/L}$  PF-552281, then cultured with or without 5 ng/ml HRG1 for 2 hours. Whole cell lysates were subjected to SDS-PAGE and Western blotting with the indicated antibodies.

**Supplementary Figure2. Other inhibitors cannot abrogate HRG1-mediated resistance**

NCI-N87 and OE19 were first incubated with 1  $\mu\text{mol/L}$  lapatinib  $\pm$  1  $\mu\text{mol/L}$  erlotinib, 300 nmol/L crizotinib, 1  $\mu\text{mol/L}$  NVP-BGJ398, 300 nmol/L AZD0530 or 1  $\mu\text{mol/L}$  PF-552281, then cultured with or without 5 ng/ml HRG1 for 72 hours. Cell proliferation was analyzed as described in Materials and Methods. All cell proliferation data are averages of quadruplicates of 3 independent experiments. bars, SD.

**Supplementary Figure3. Trastuzumab cannot inhibit HRG1-mediated phosphorylation of HER3 and AKT and HRG1-mediated resistance to lapatinib**

(A) NCI-N87 and OE19 were treated with 1  $\mu\text{mol/L}$  lapatinib  $\pm$  20  $\mu\text{g/ml}$  trastuzumab for 30 minutes, then cultured with or without 5 ng/ml HRG1 for 2 hours. Whole cell lysates were

subjected to SDS-PAGE and Western blotting with the indicated antibodies. (B) NCI-N87 and OE19 were treated with 1  $\mu\text{mol/L}$  lapatinib  $\pm$  20  $\mu\text{g/ml}$  trastuzumab for 30 minutes, then cultured with or without 5 ng/ml HRG1 for 72 hours. Cell proliferation was analyzed as described in Materials and Methods. All cell proliferation data are averages of quadruplicates of 3 independent experiments. bars, SD. \*t-test,  $p < 0.001$

# Supplementary figure 1

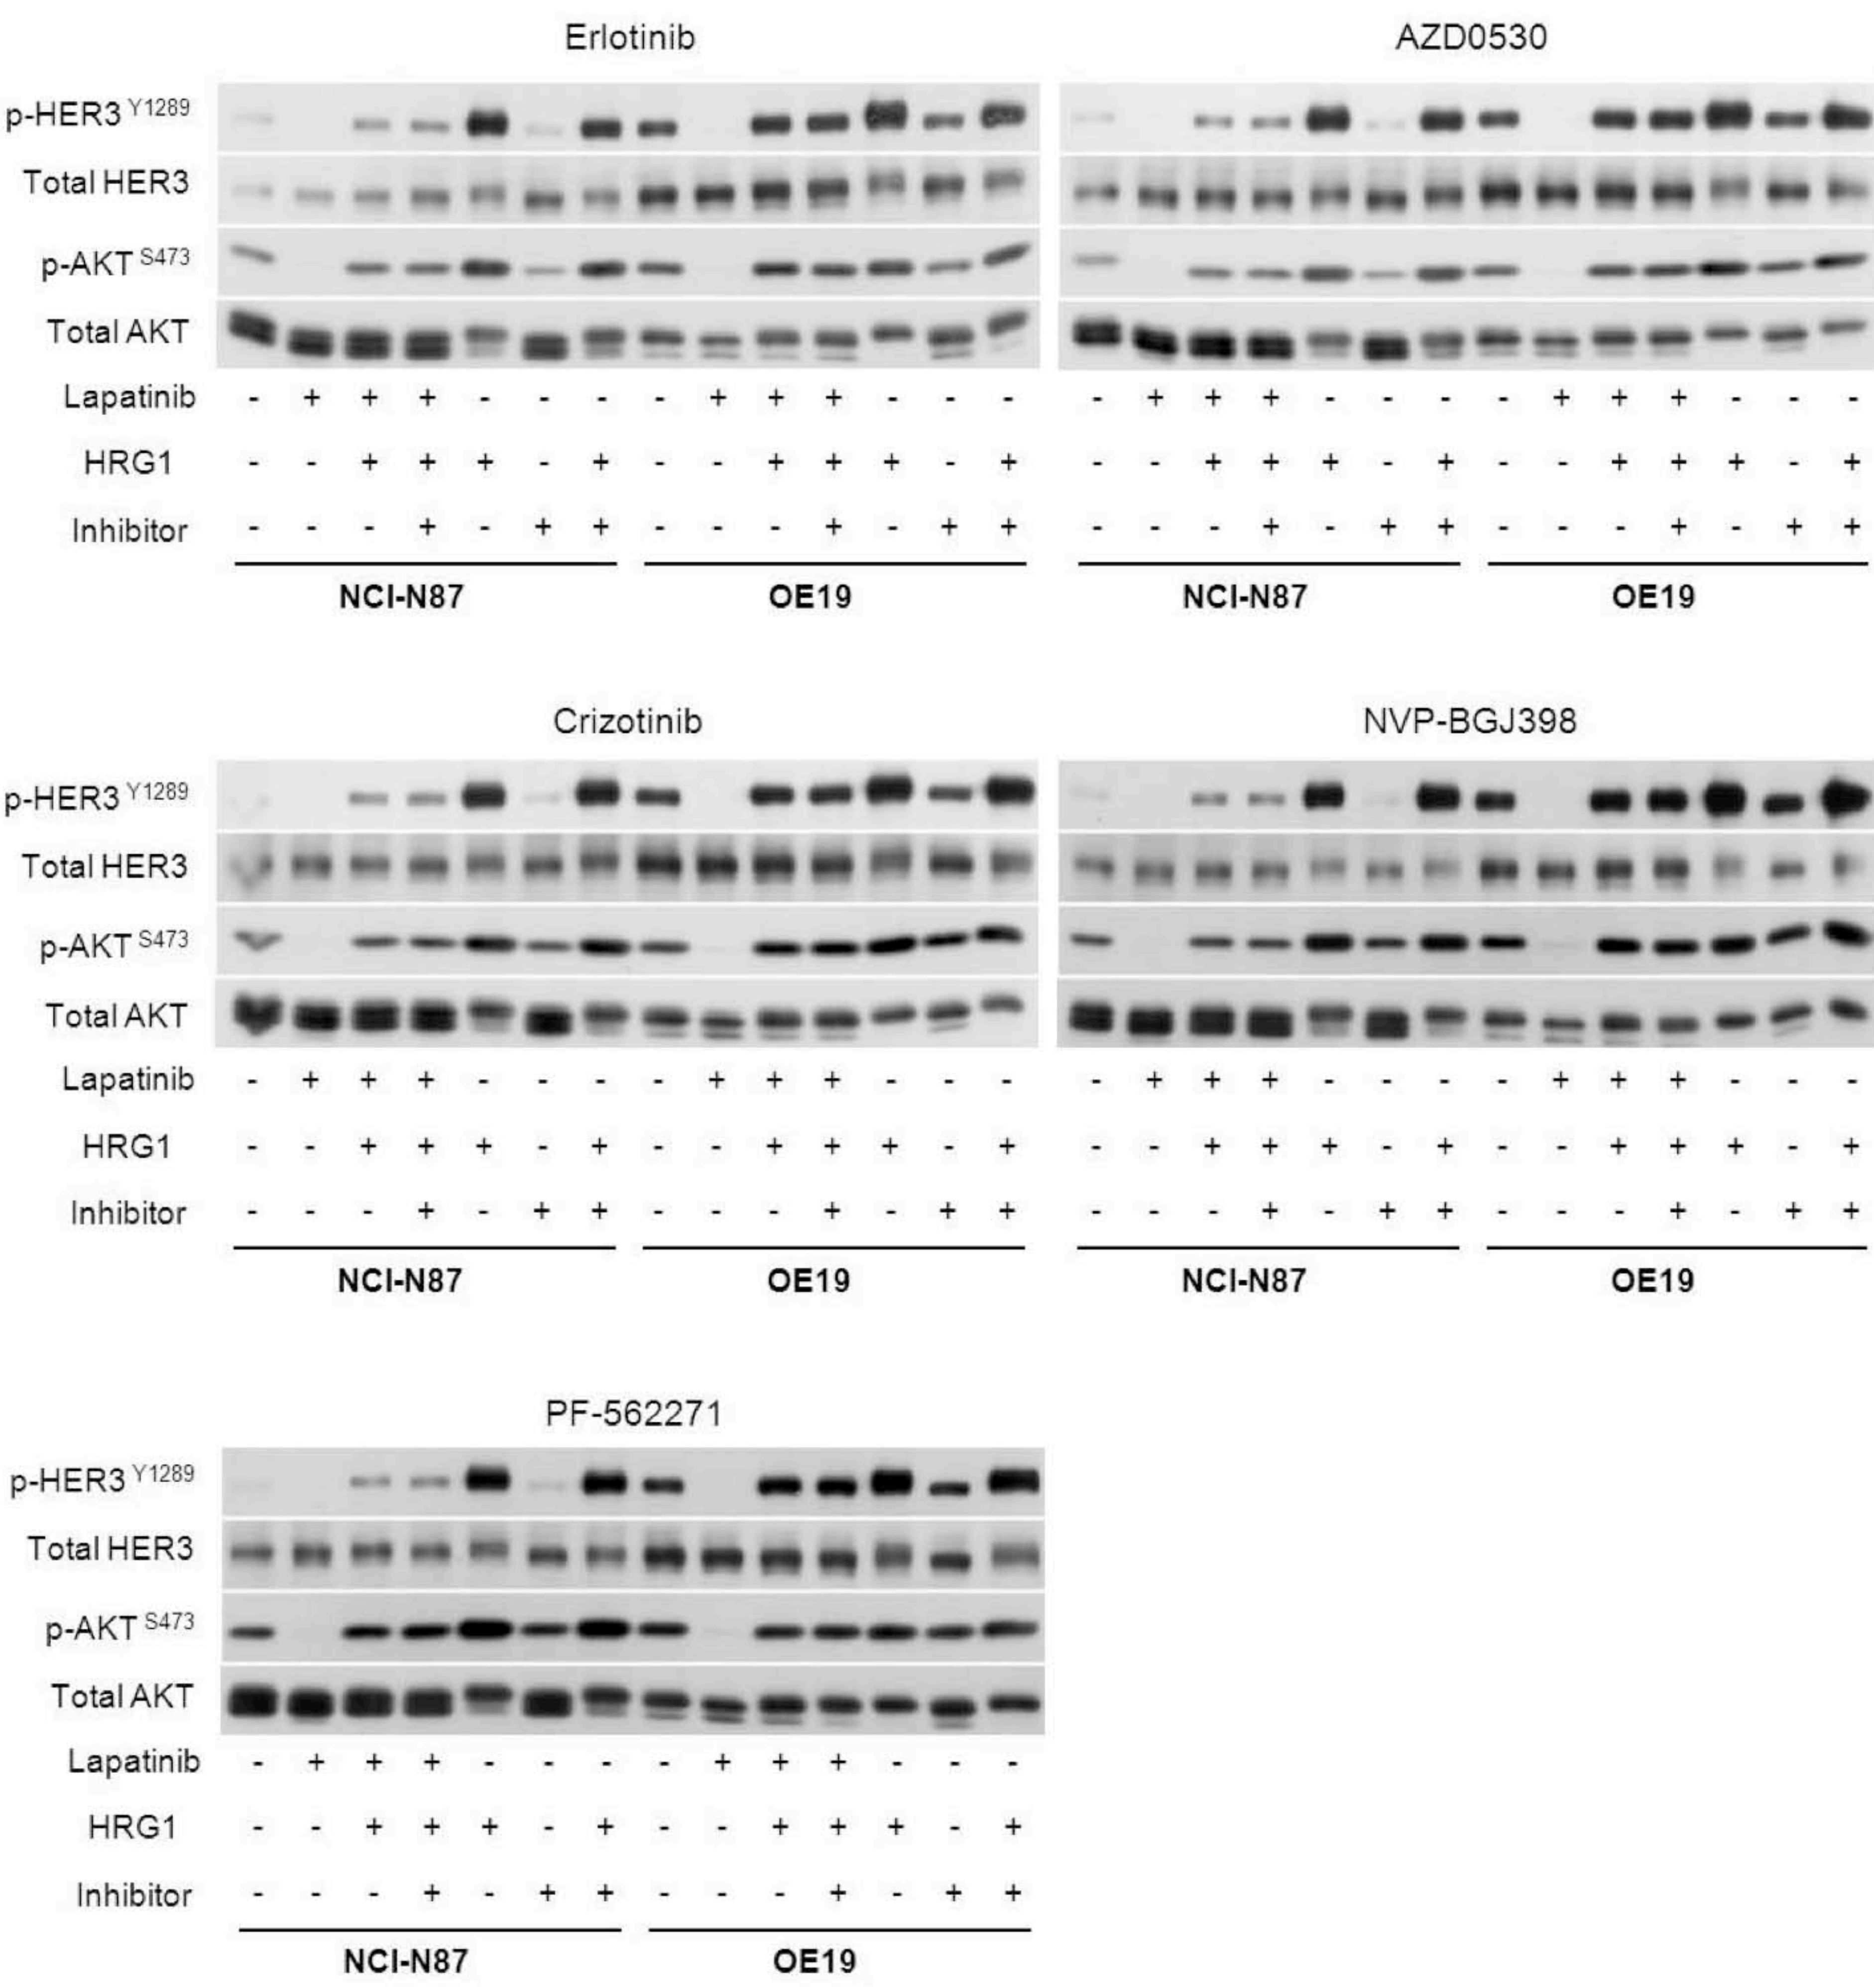

**Supplementary figure 2**

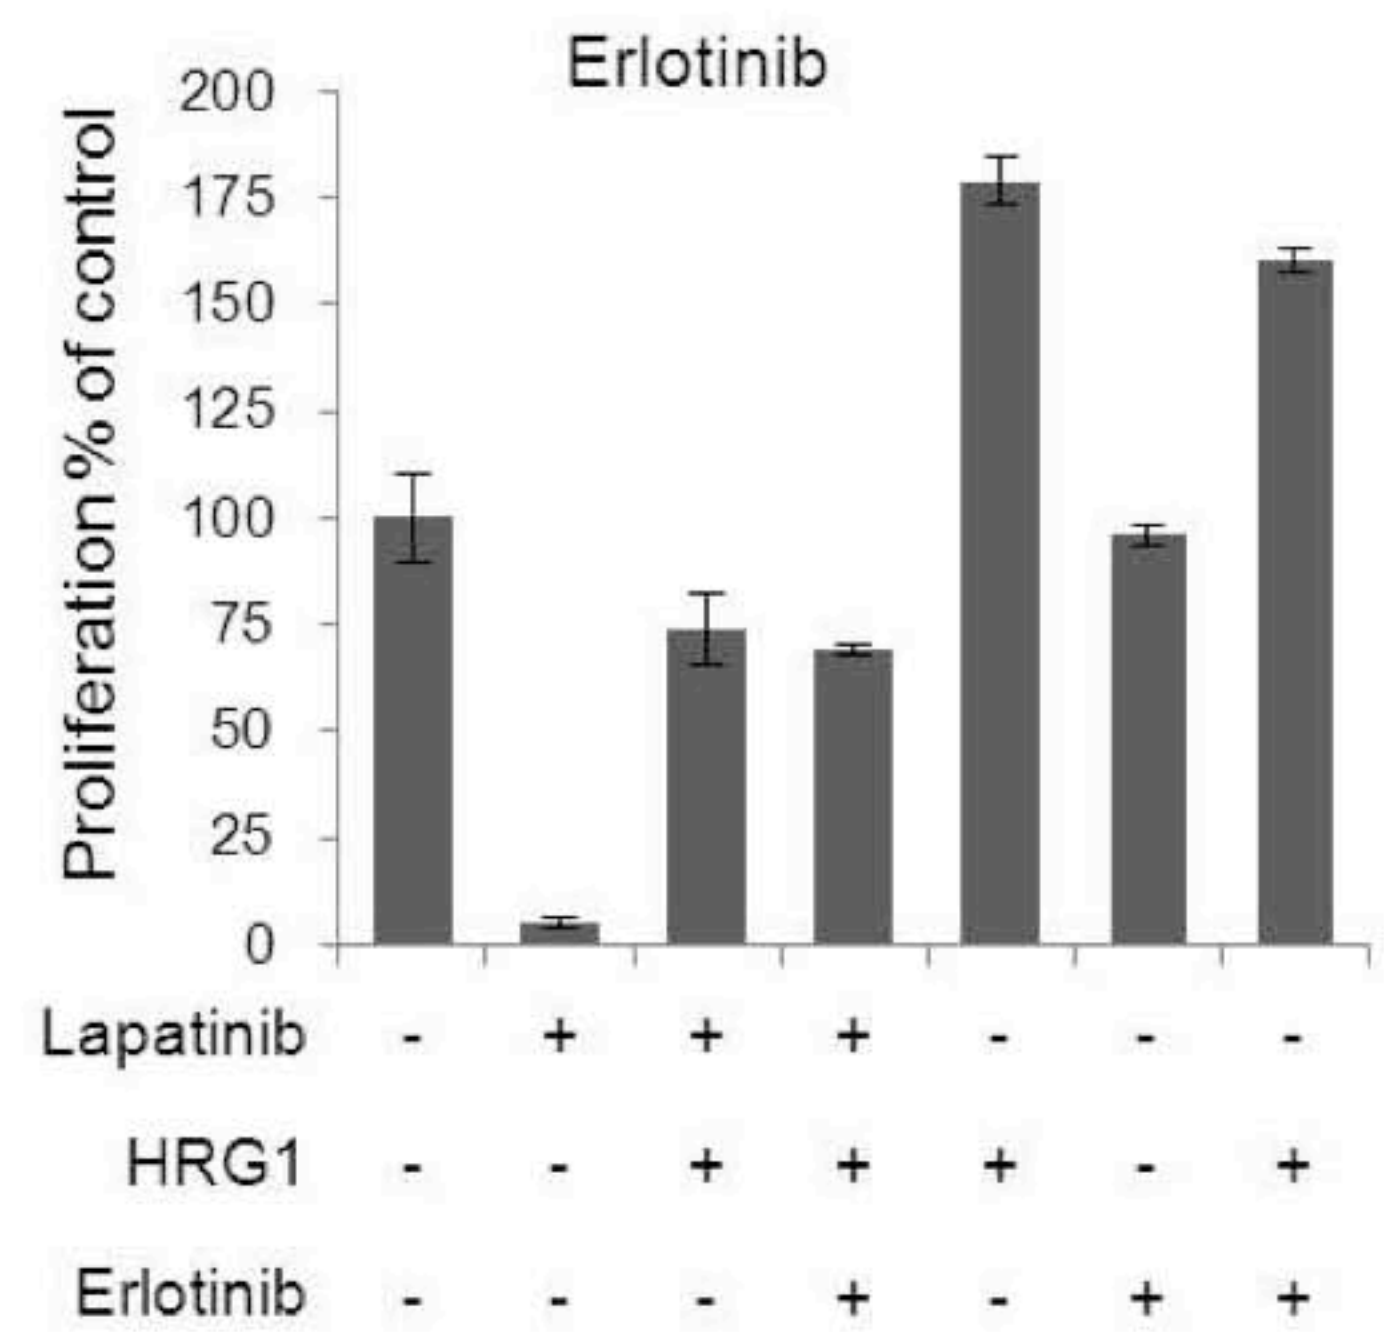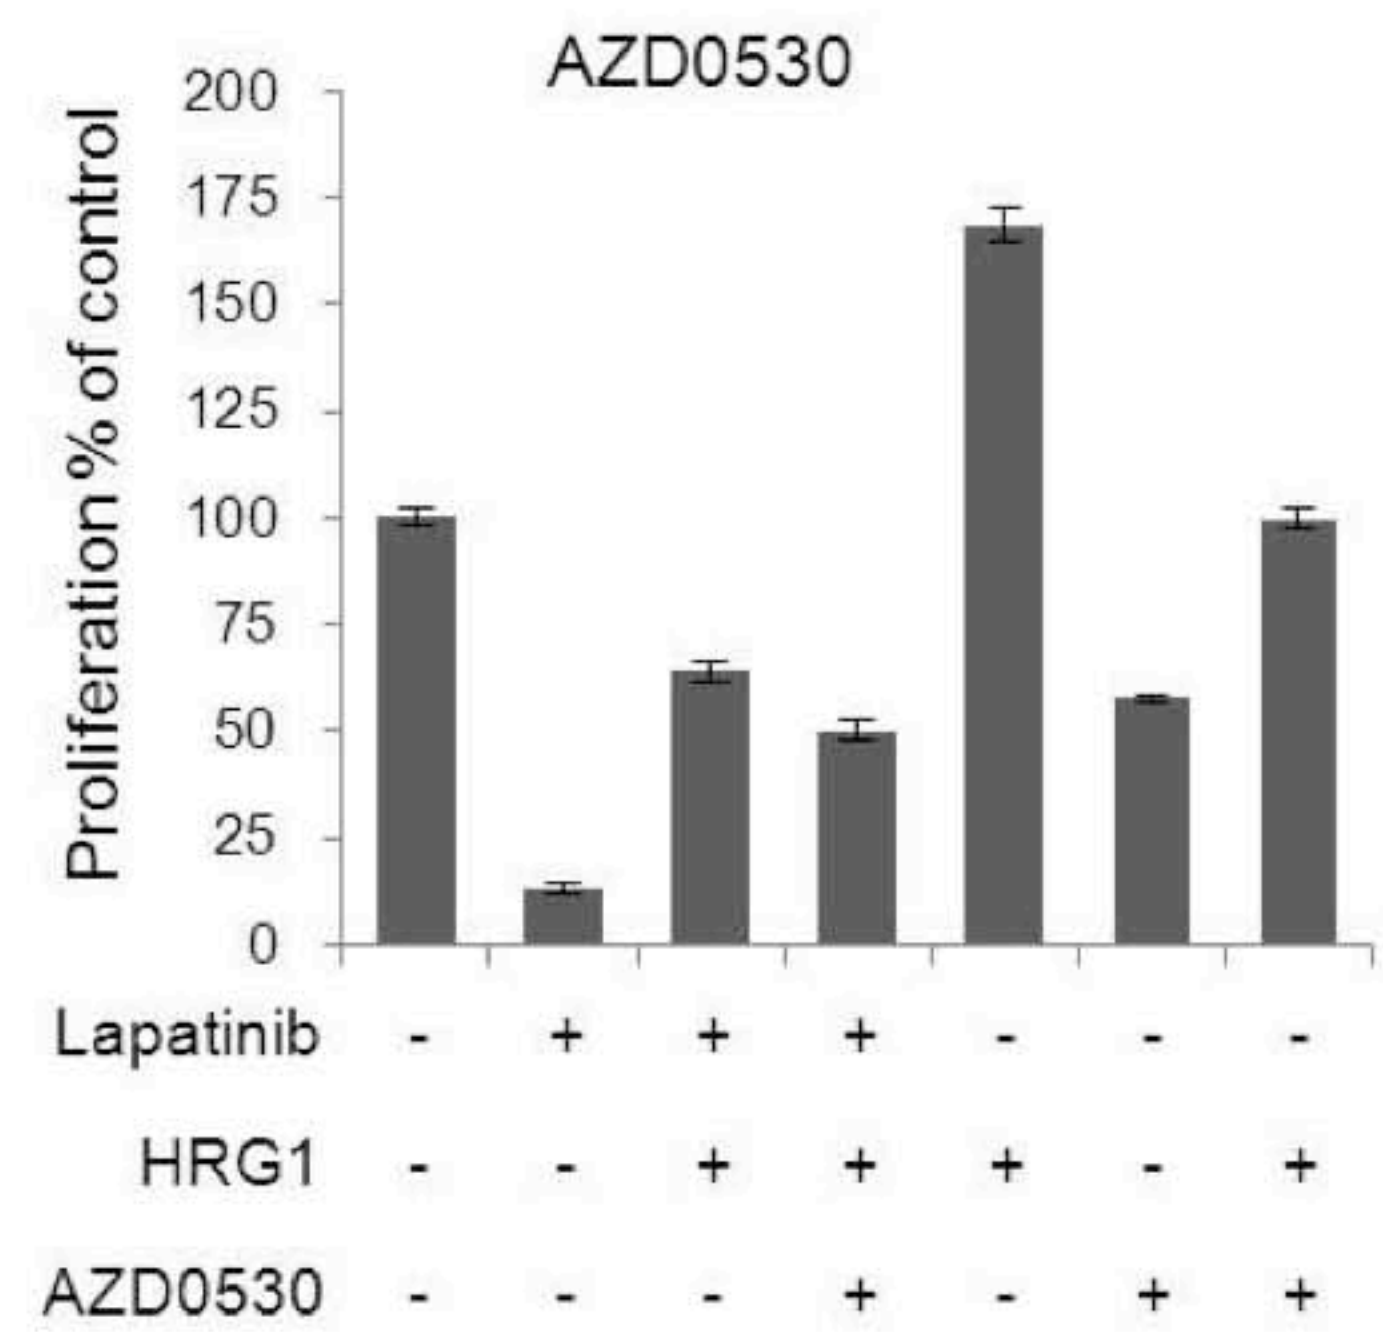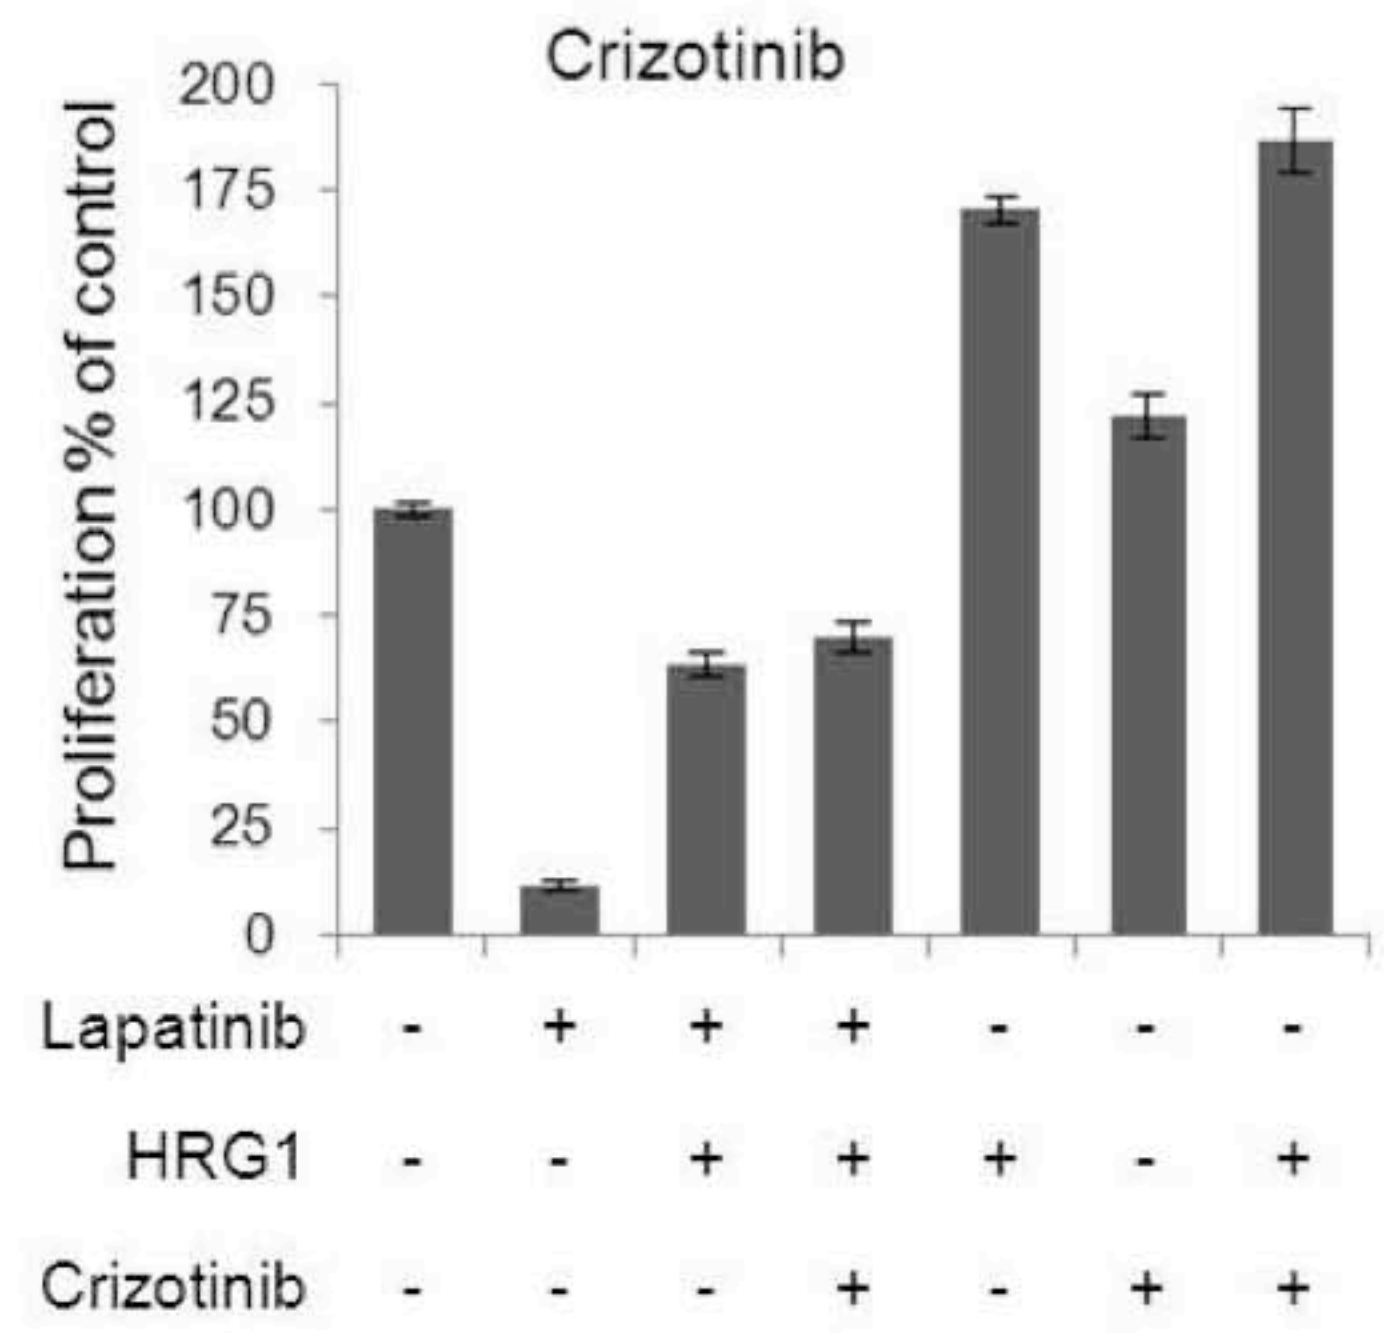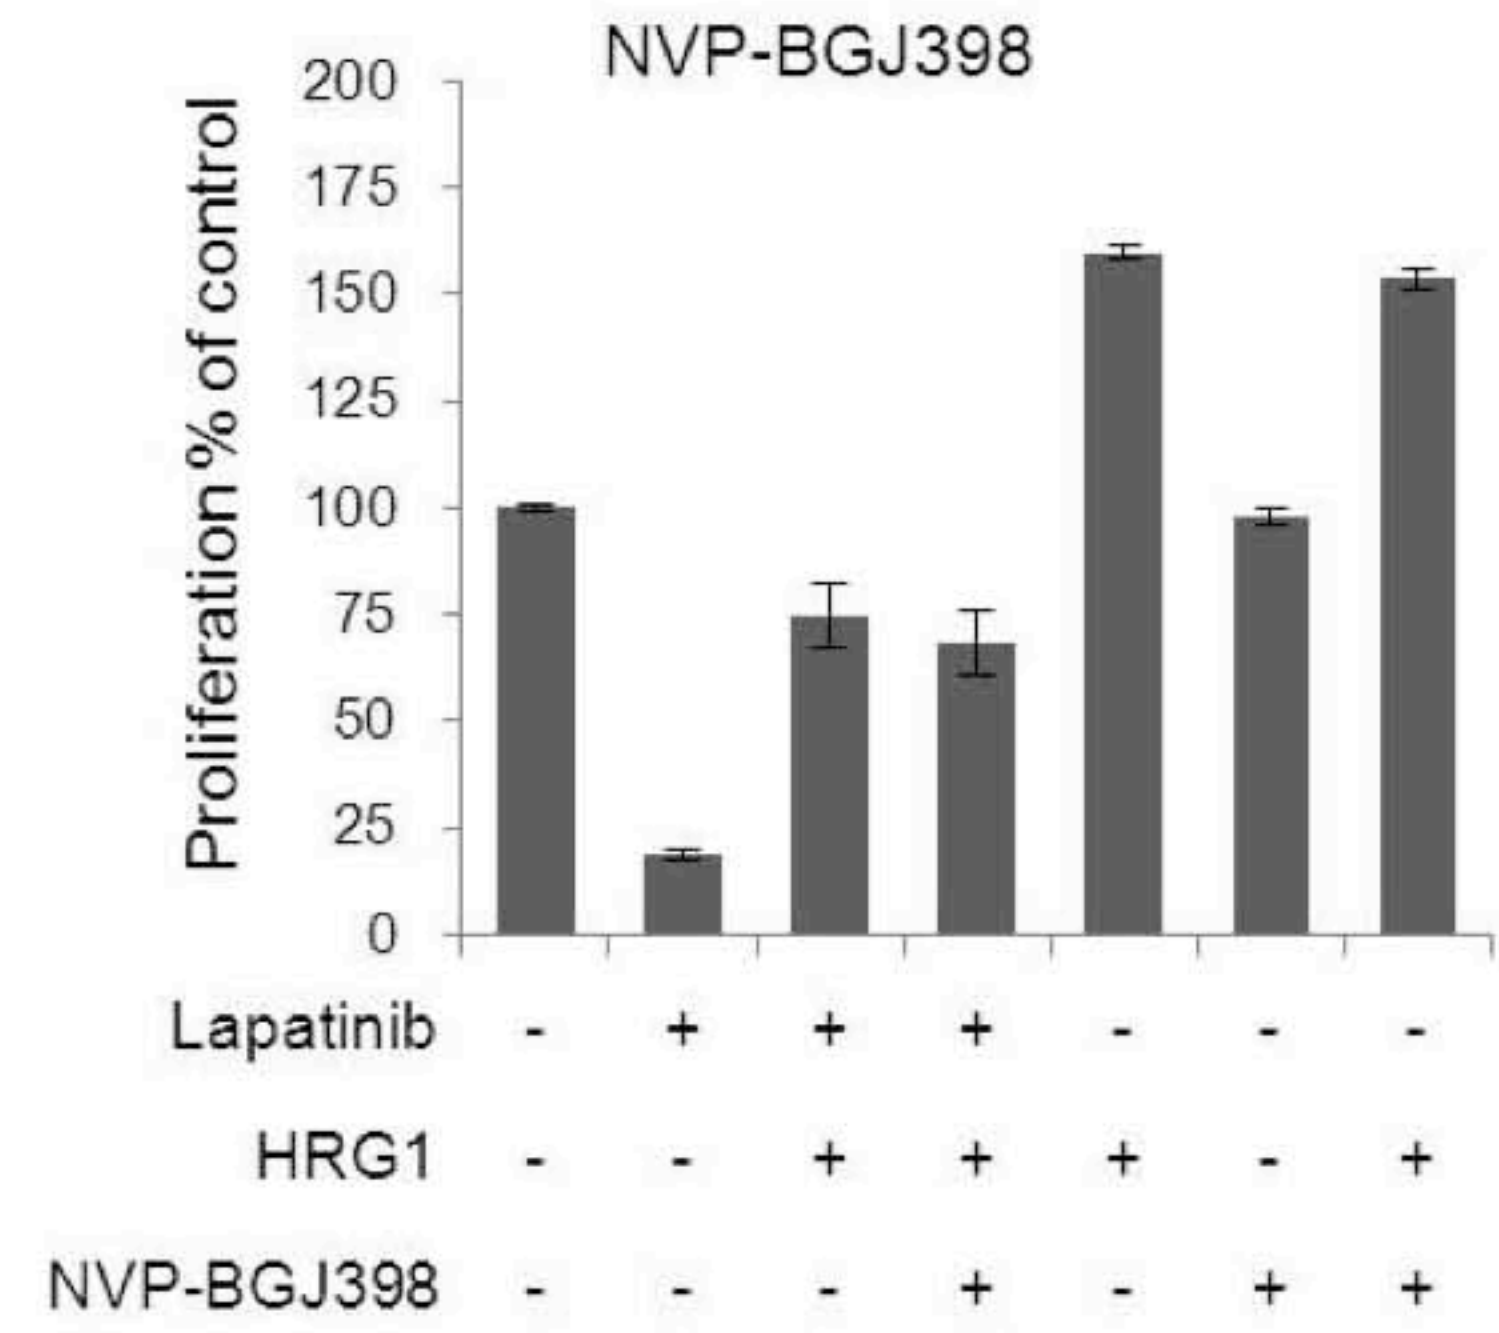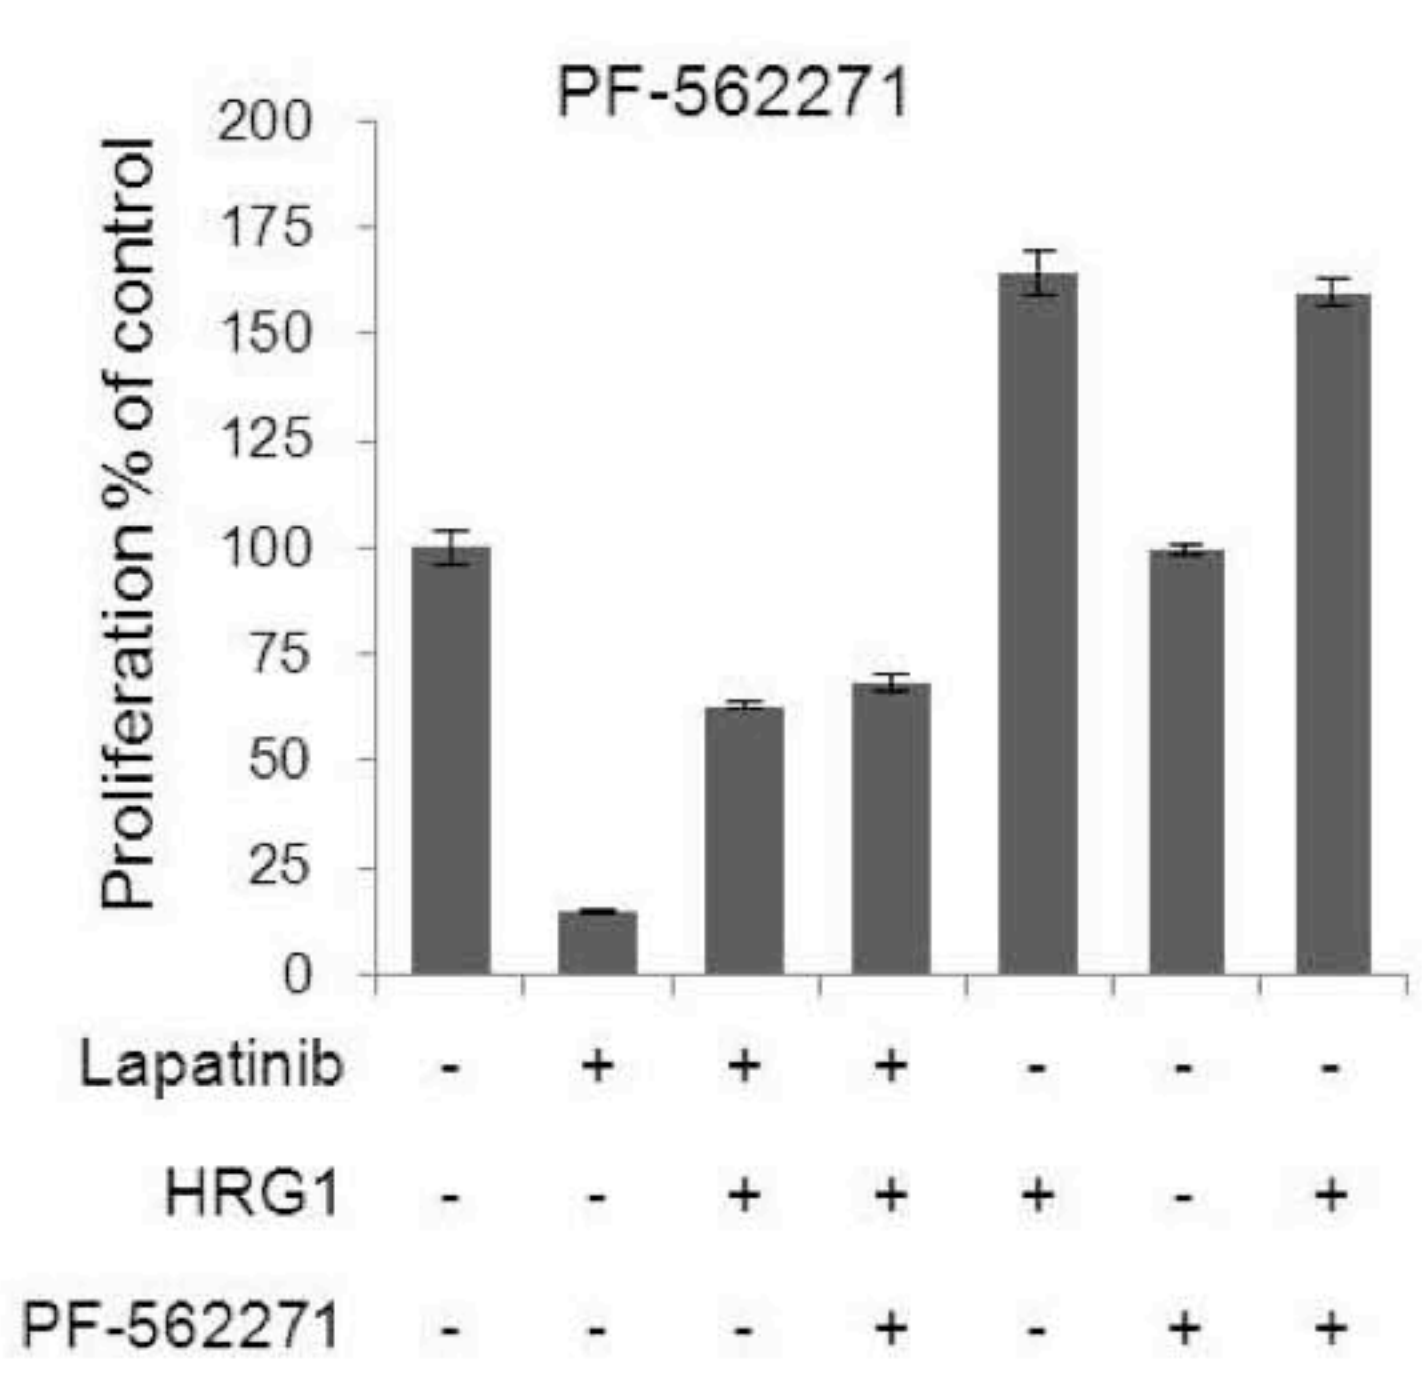

Supplementary figure 3

**A**

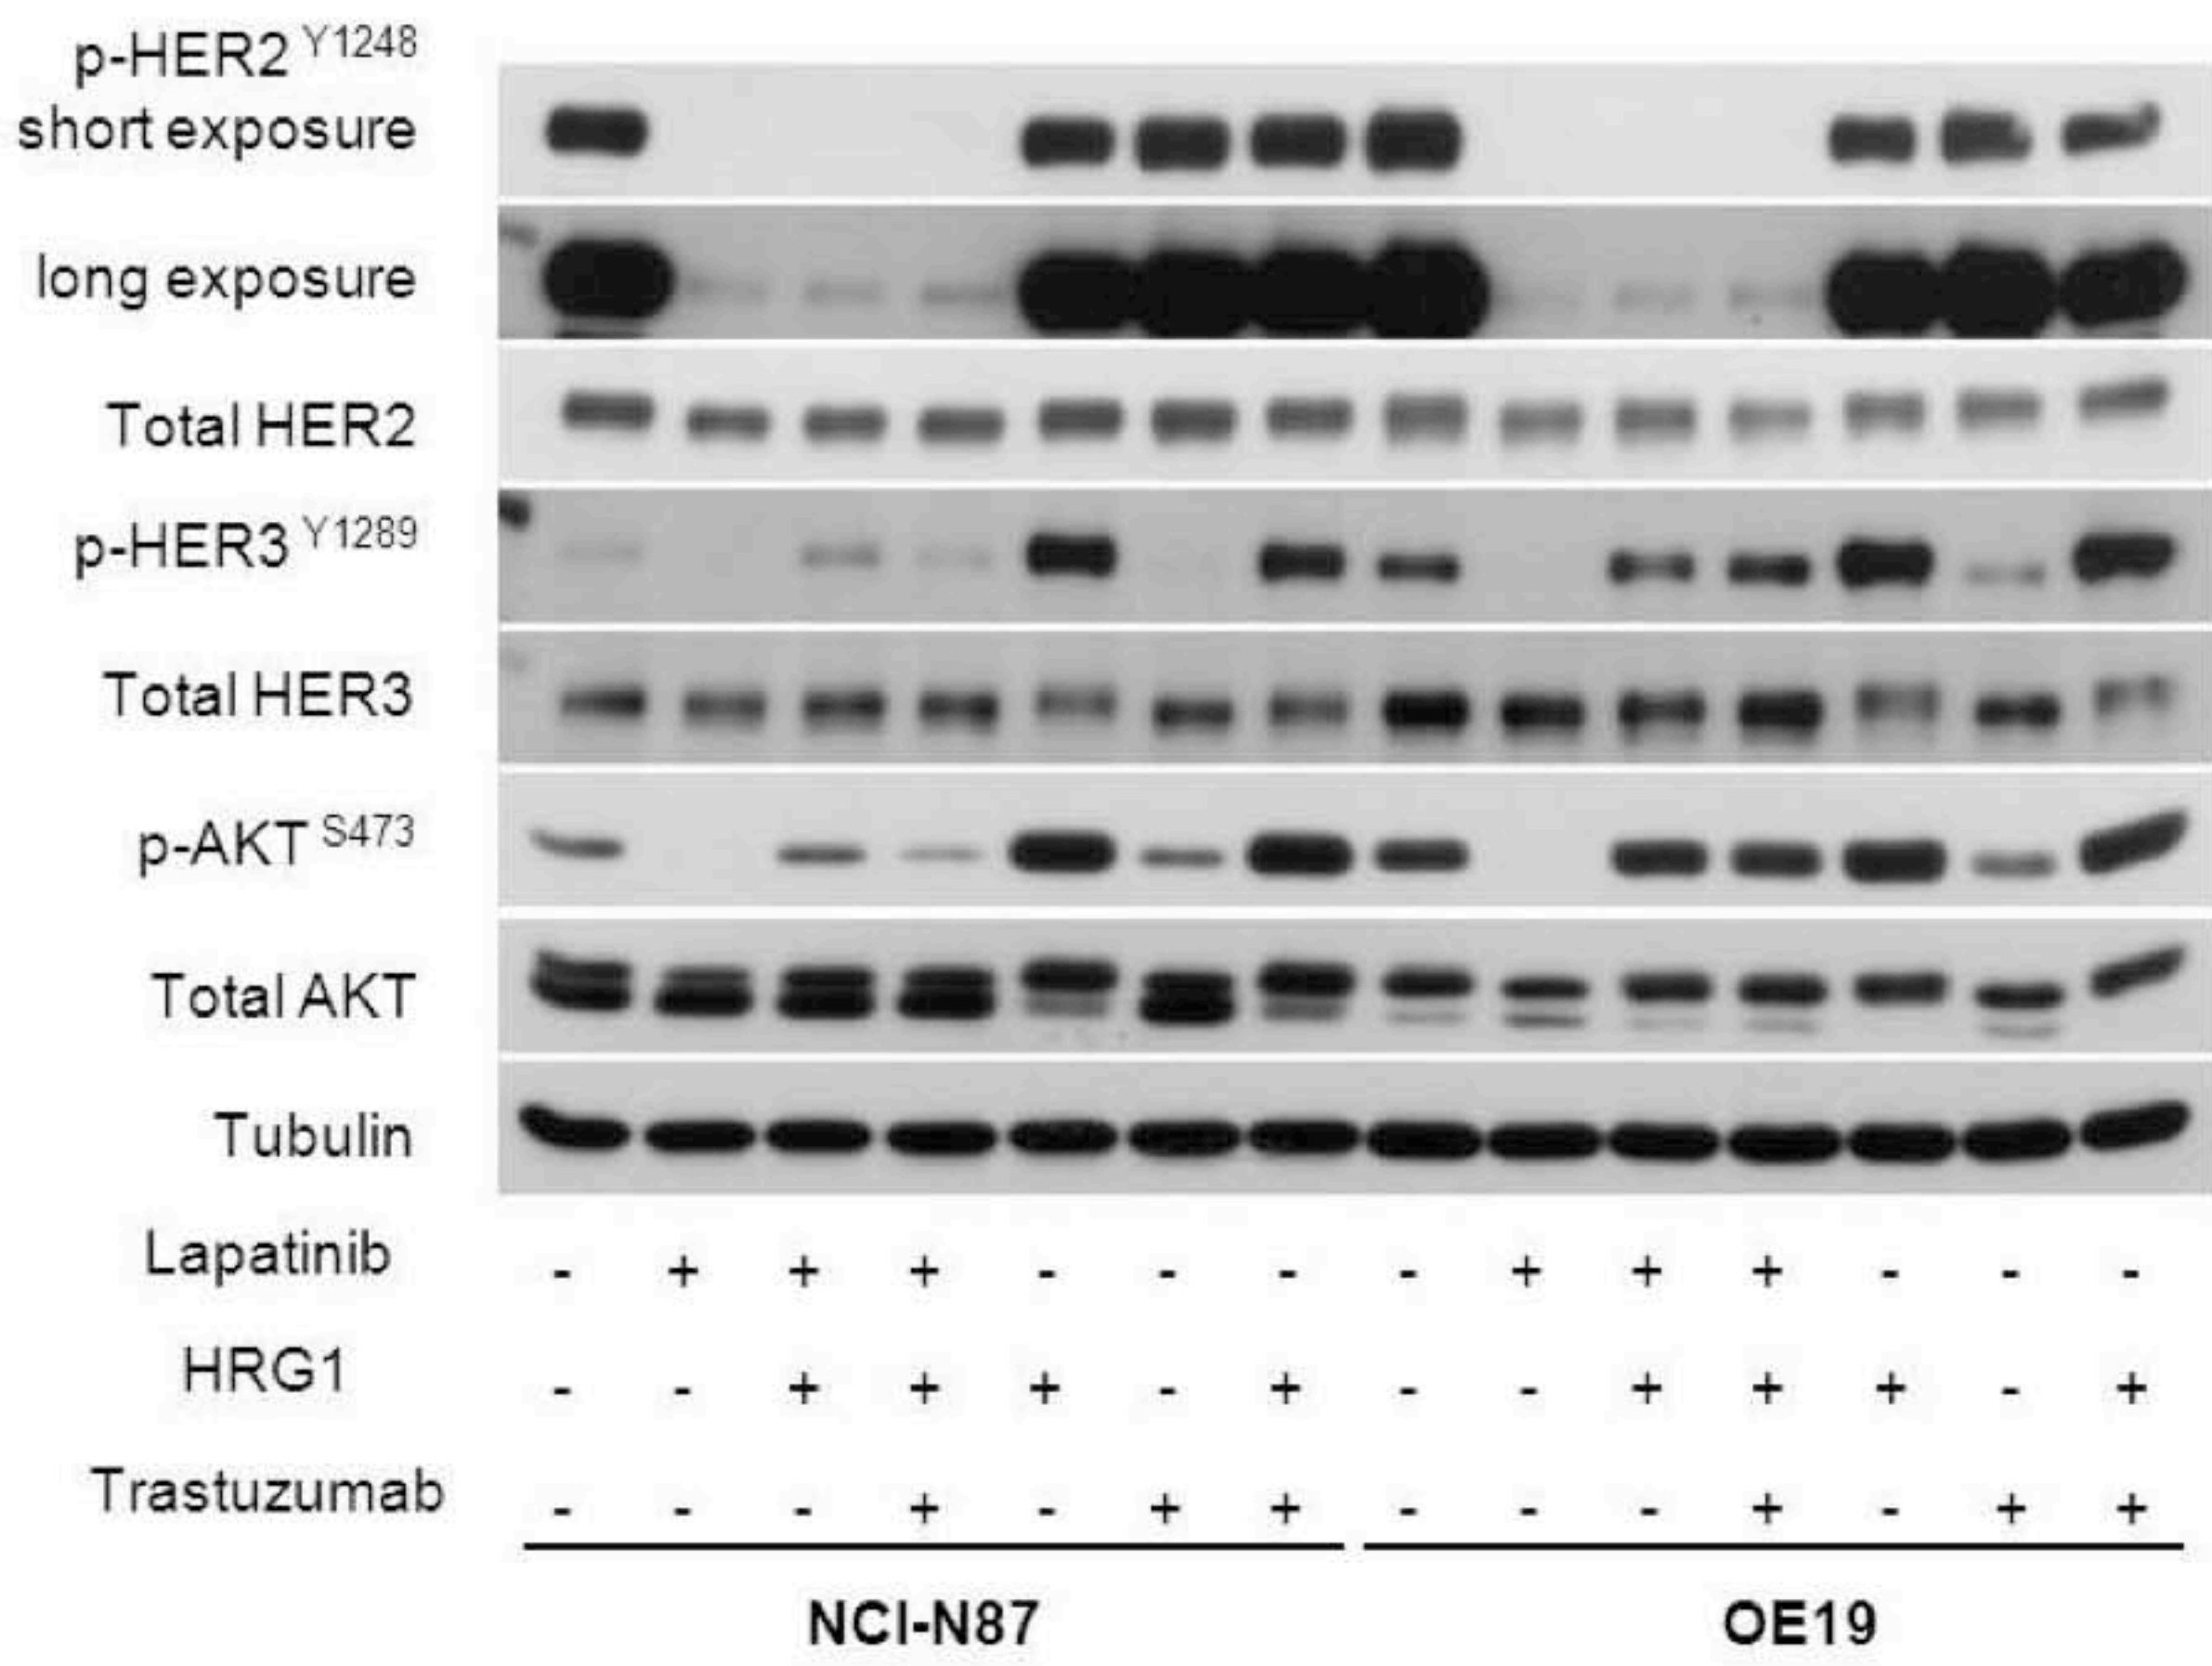

**B**

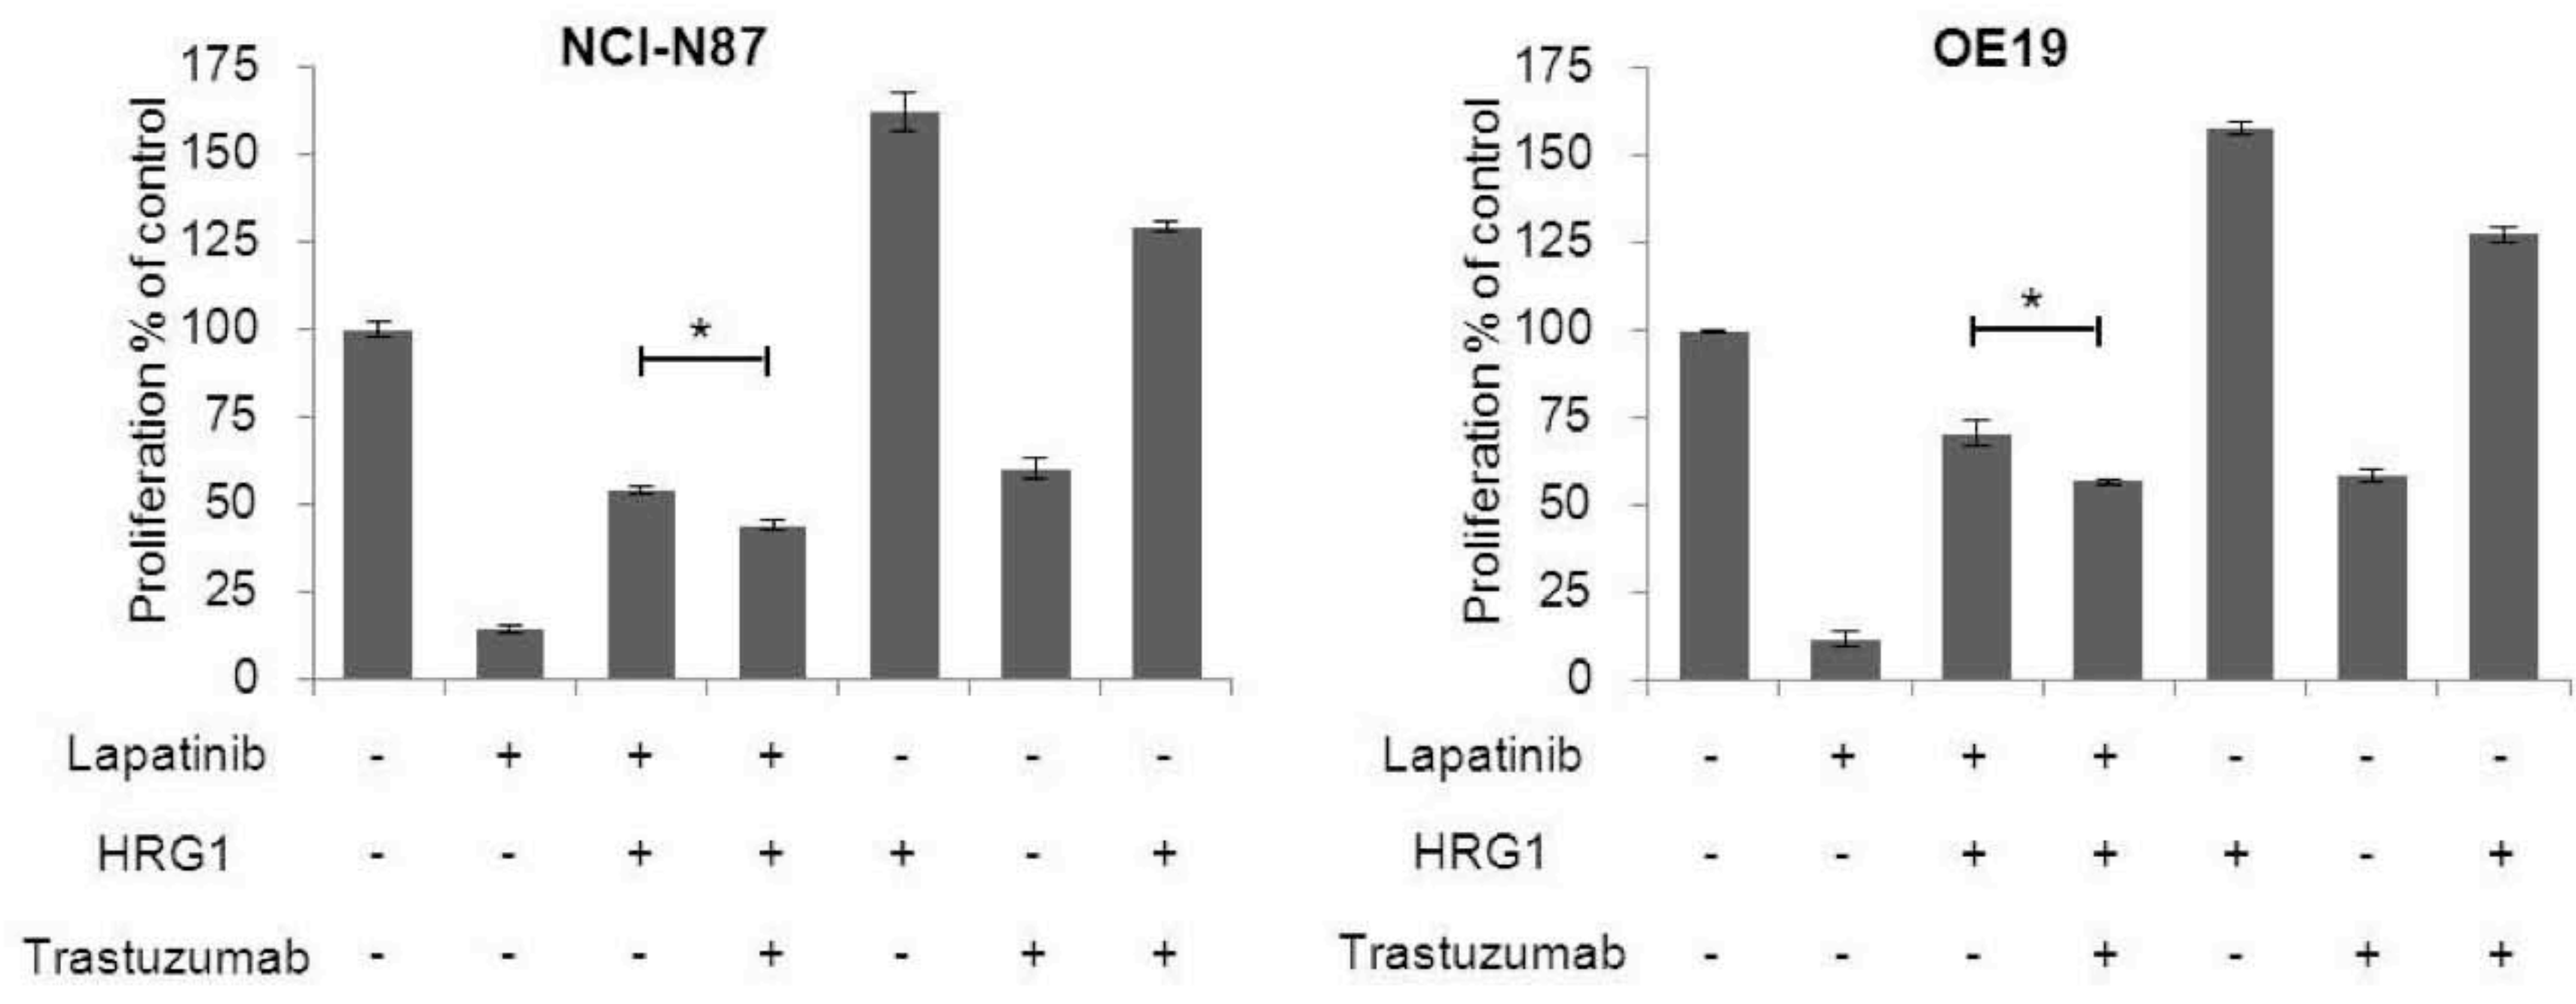

Supplement: CAS-104-1618-s001.pdf [file CAS-104-1618-s001.pdf]
